# Supplementary material
Source: MDPI journal article supplement (https://www.mdpi.com/2072-4292/15/20/4946)
Supplement: s1 [file s1]

# Evaluation of the Spatial Distribution of Predictors of Fire Regimes in China from 2003 to 2016

Jiajia Su <sup>1,2</sup>, Zhihua Liu <sup>1,\*</sup>, Wenjuan Wang <sup>3</sup>, Kewei Jiao <sup>1</sup>, Yue Yu <sup>1</sup>, Kaili Li <sup>1</sup>, Qiushuang Lü <sup>1</sup> and Tamara L. Fletcher <sup>1</sup>

<sup>1</sup> Institute of Applied Ecology, Chinese Academy of Sciences, Shenyang 110016, China; jiajia.su@mail.bnu.edu.cn (J.S.); jiaokewei@iae.ac.cn (K.J.); yuyue@iae.ac.cn (Y.Y.); likaili19@mails.ucas.ac.cn (K.L.); lvqiushuang17@mails.ucas.ac.cn (Q.L.); t.l.fletcher@leeds.ac.uk (T.L.F.)

<sup>2</sup> State Key Laboratory of Earth Surface Processes and Resource Ecology, Faculty of Geographical Science, Beijing Normal University, Beijing 100091, China

<sup>3</sup> Northeast Institute of Geography and Agroecology, Chinese Academy of Sciences, Changchun 130028, China; wangwenj@iga.ac.cn

\* Correspondence: liuzh@iae.ac.cn

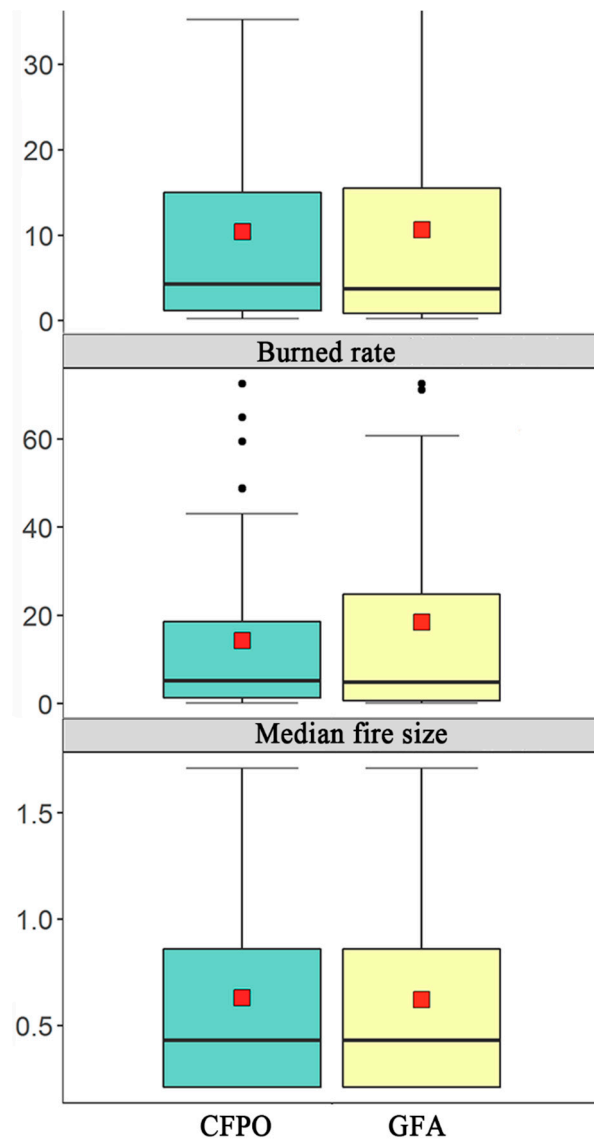

**Figure S1.** Comparison between GFA dataset and documentary dataset.

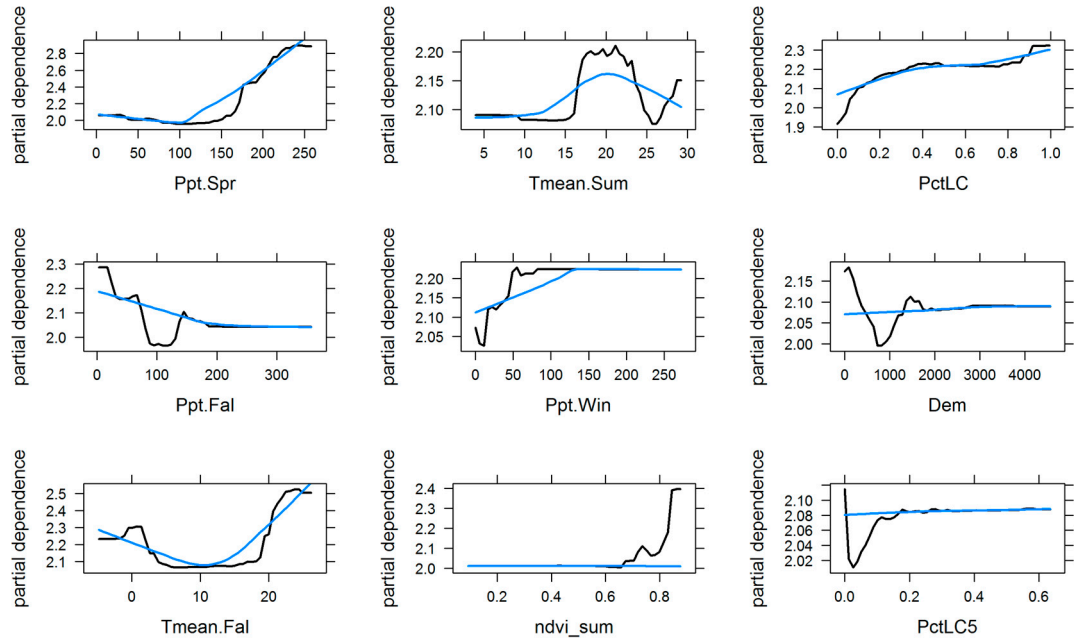

**Figure S2.** The partial dependence plots for national scale occurrence density (RF).

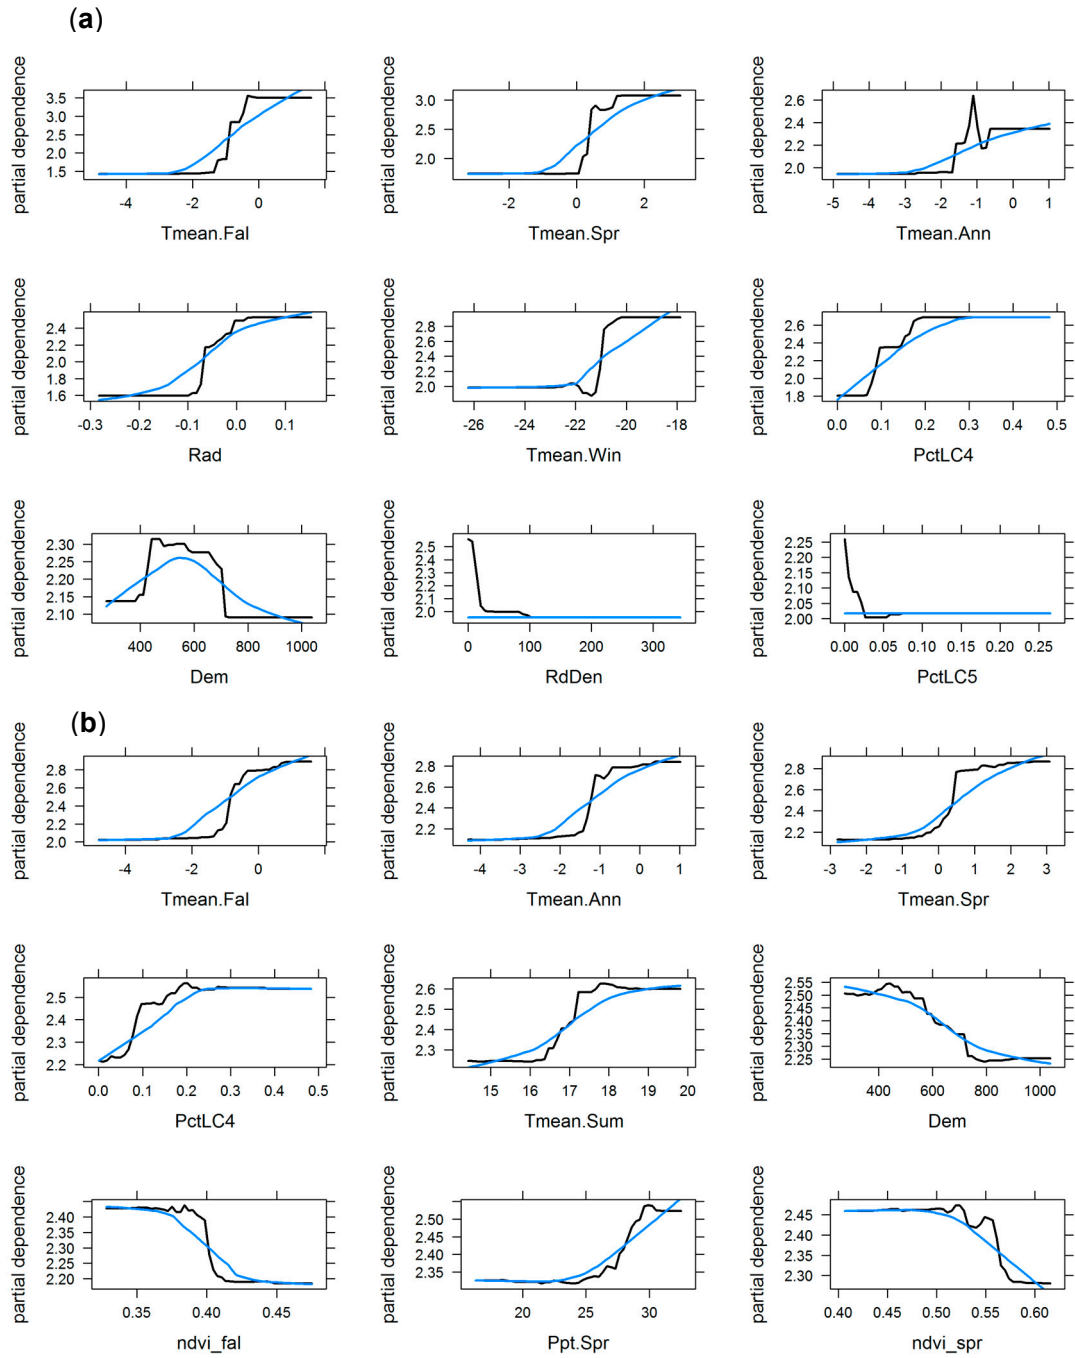

**Figure S3.** The partial dependence plots for Zone I **(a)** BRT and **(b)** RF occurrence density.

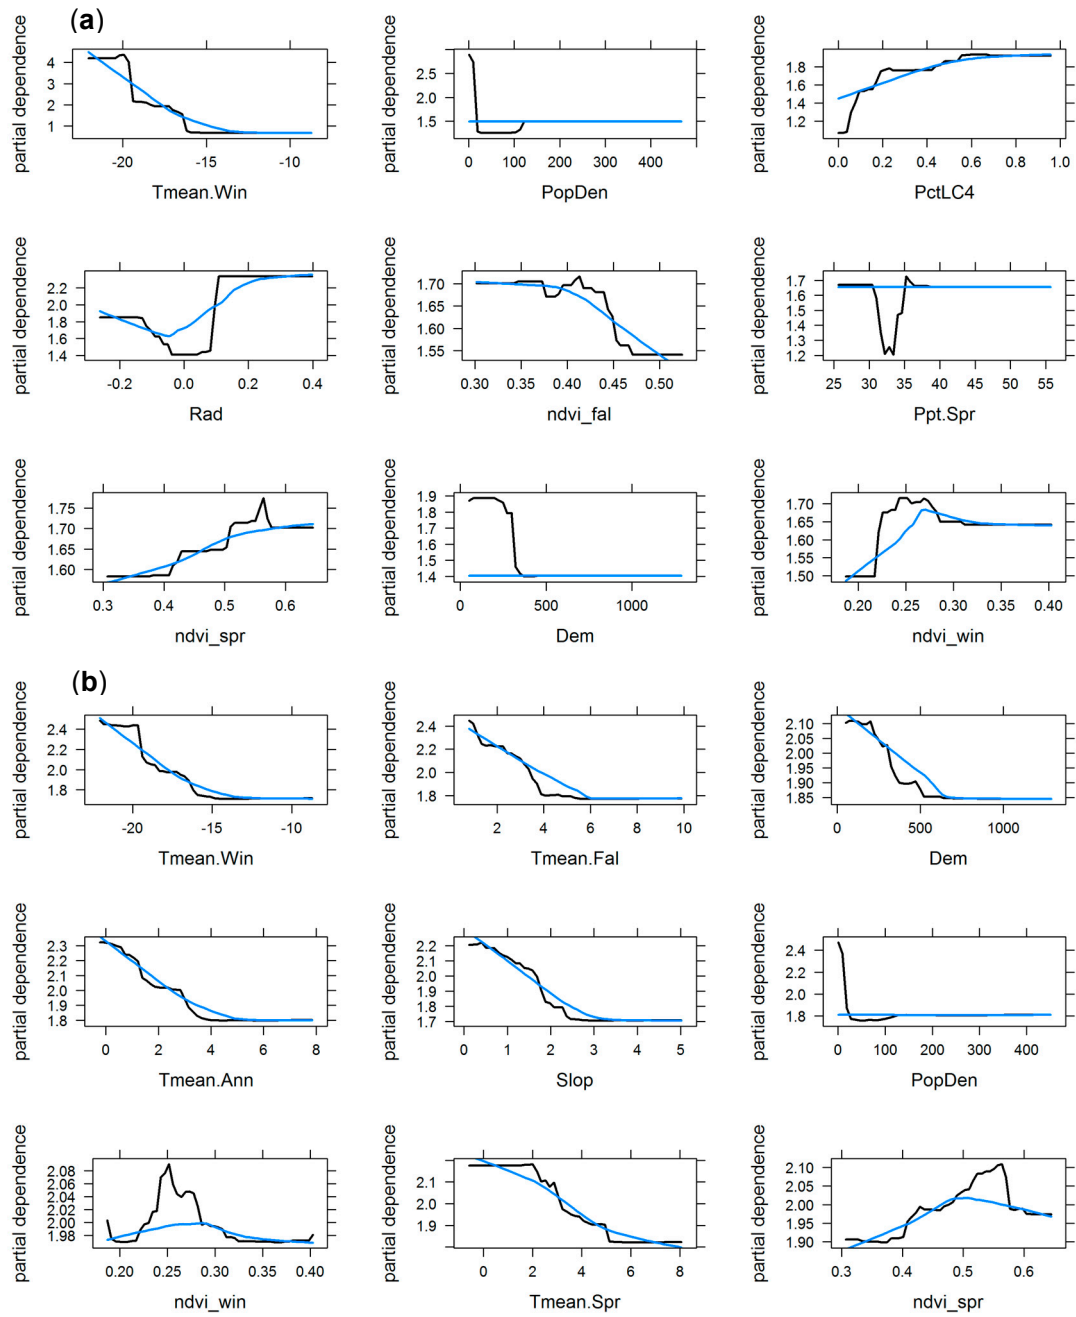

**Figure S4.** The partial dependence plots for Zone II (a) BRT and (b) RF occurrence density

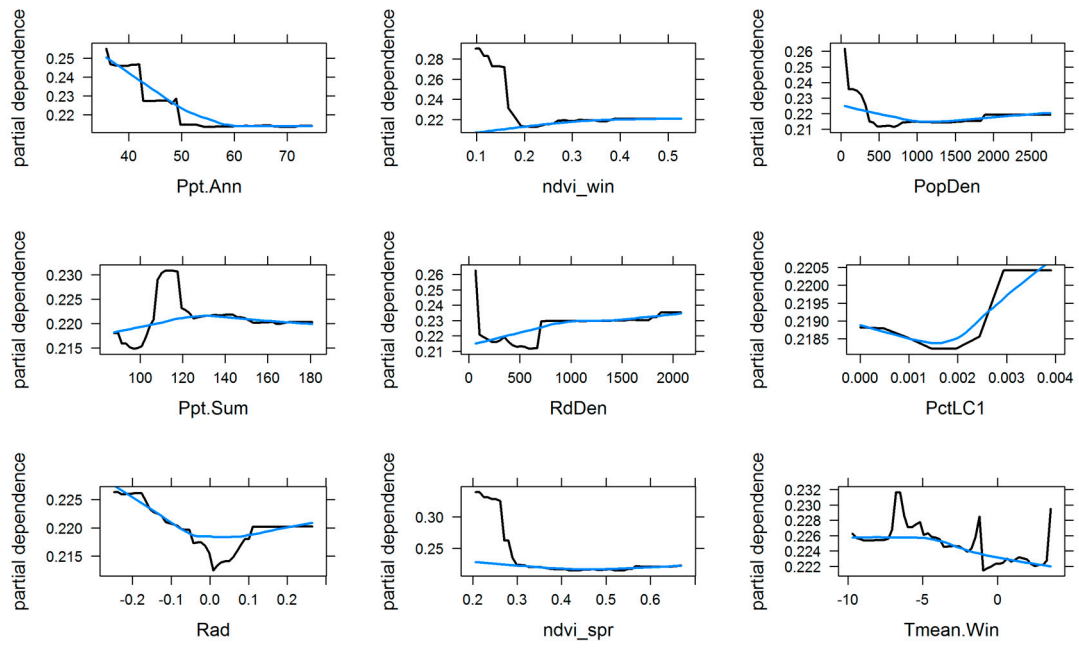

**Figure S5.** The partial dependence plots for Zone III occurrence density (RF).

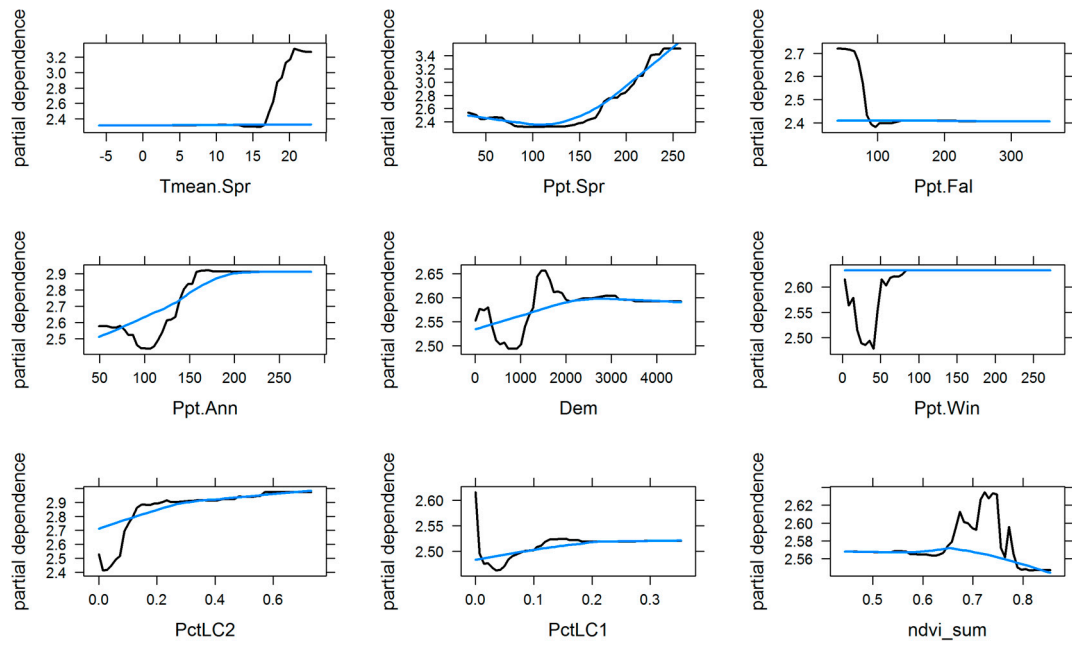

**Figure S6.** The partial dependence plots for Zone IV occurrence density (RF).

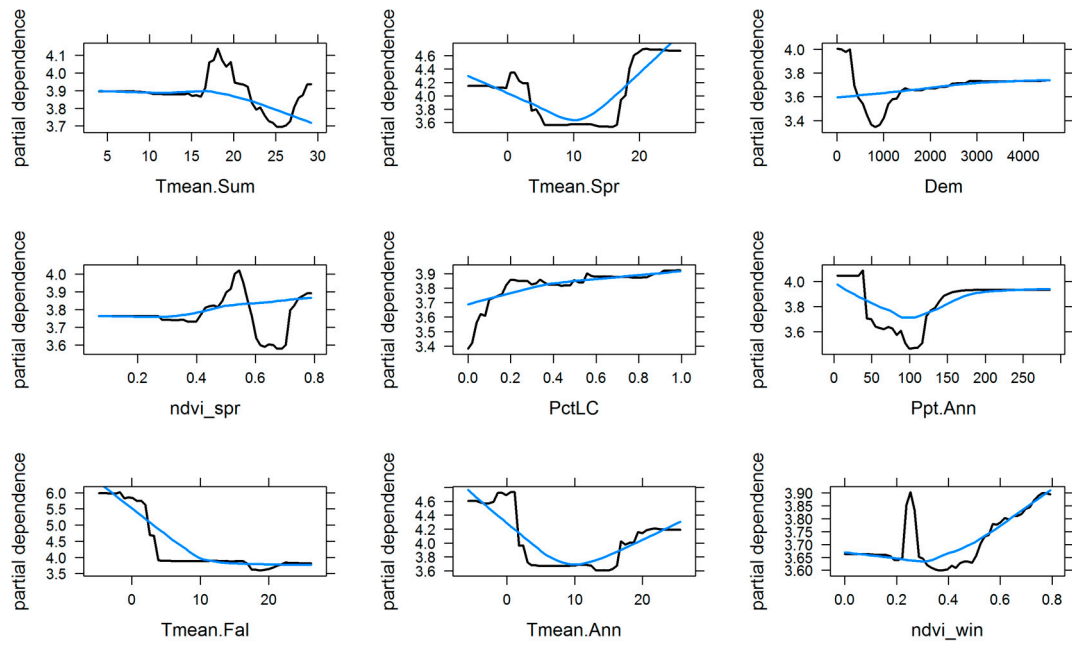

**Figure S7.** The partial dependence plots for national scale burned rate (RF).



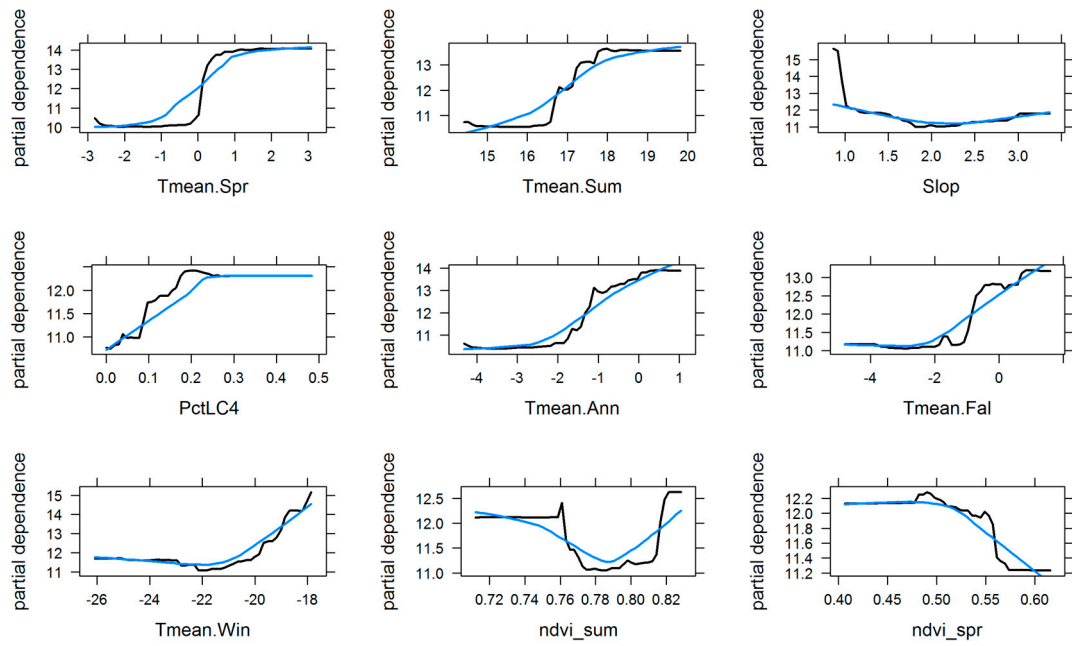

**Figure S8.** The partial dependence plots for Zone I burned rate (RF).

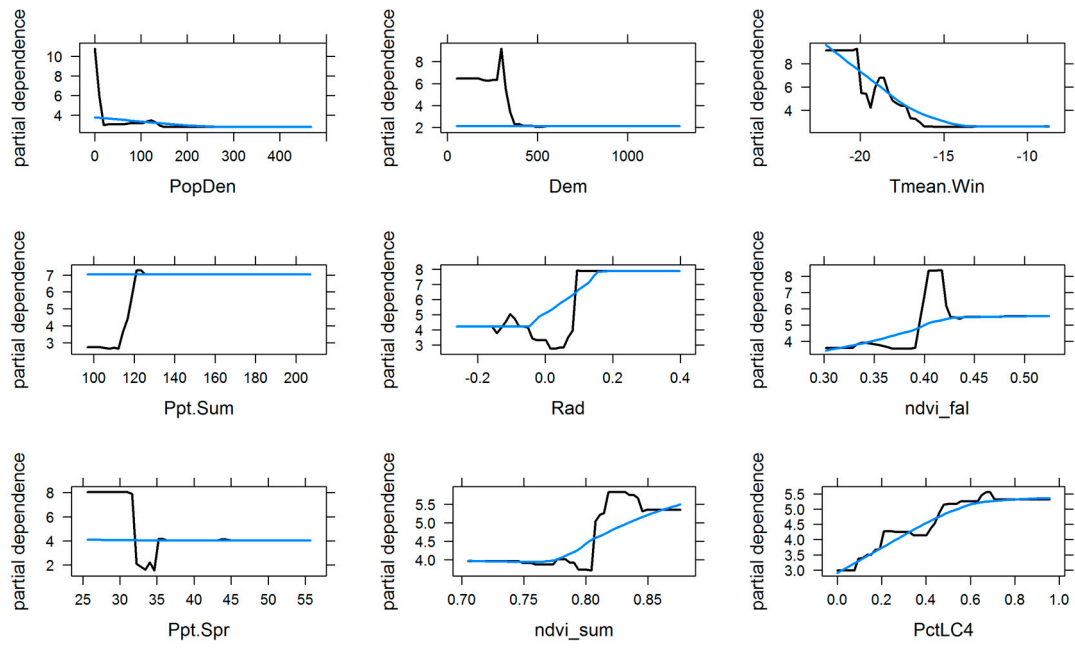

**Figure S9.** The partial dependence plots for Zone II burned rate (BRT).

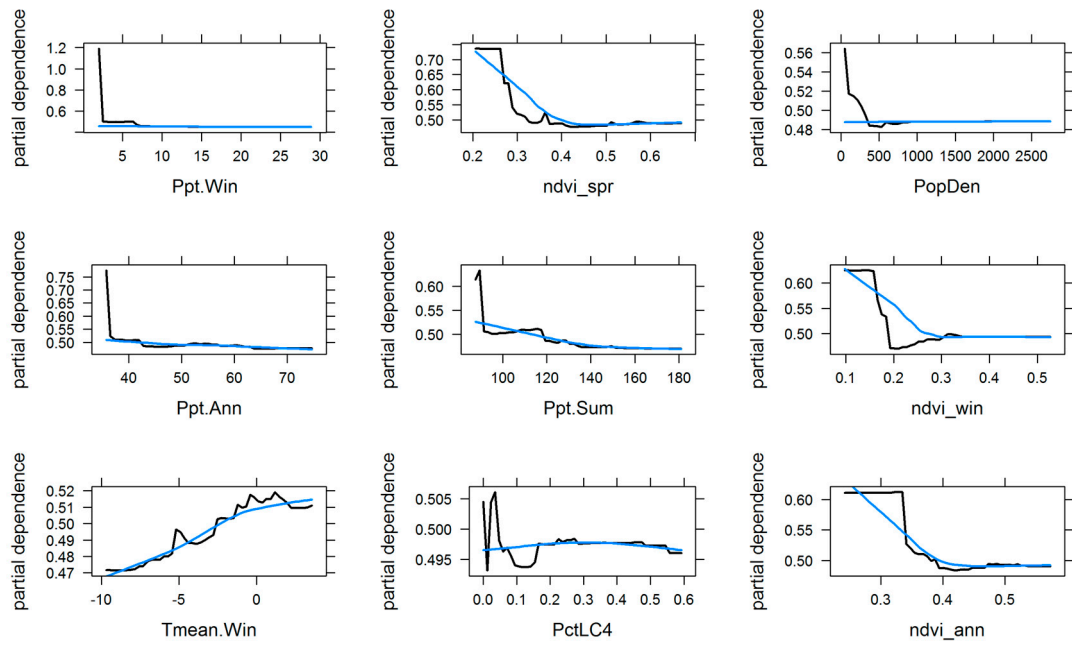

**Figure S10.** The partial dependence plots for Zone III burned rate (RF).

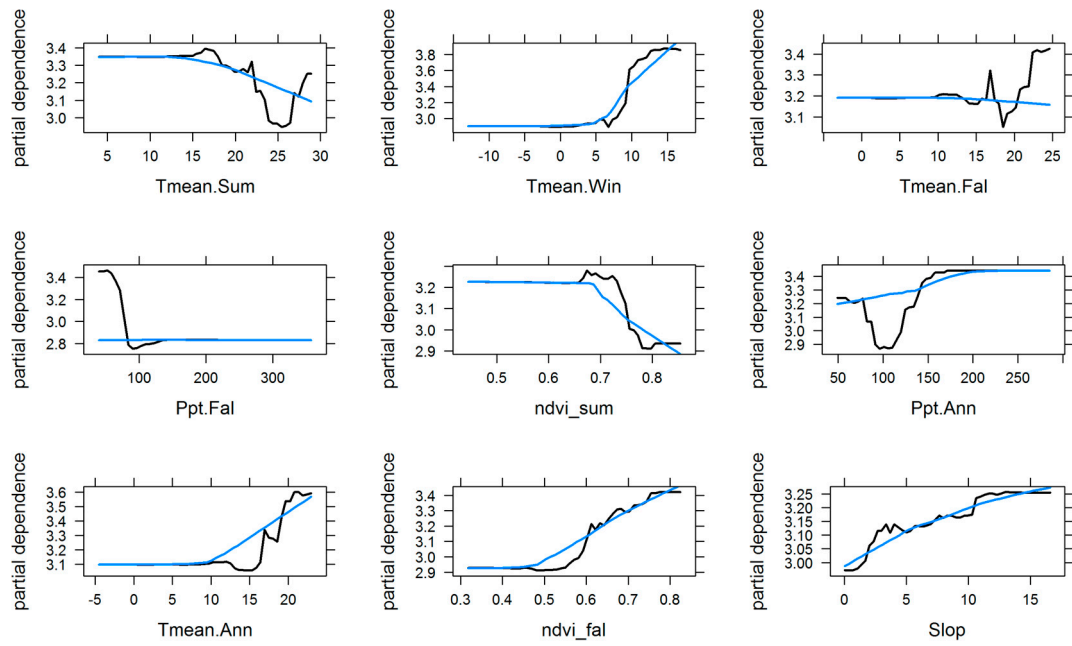

**Figure S11.** The partial dependence plots for Zone IV burned rate (RF).

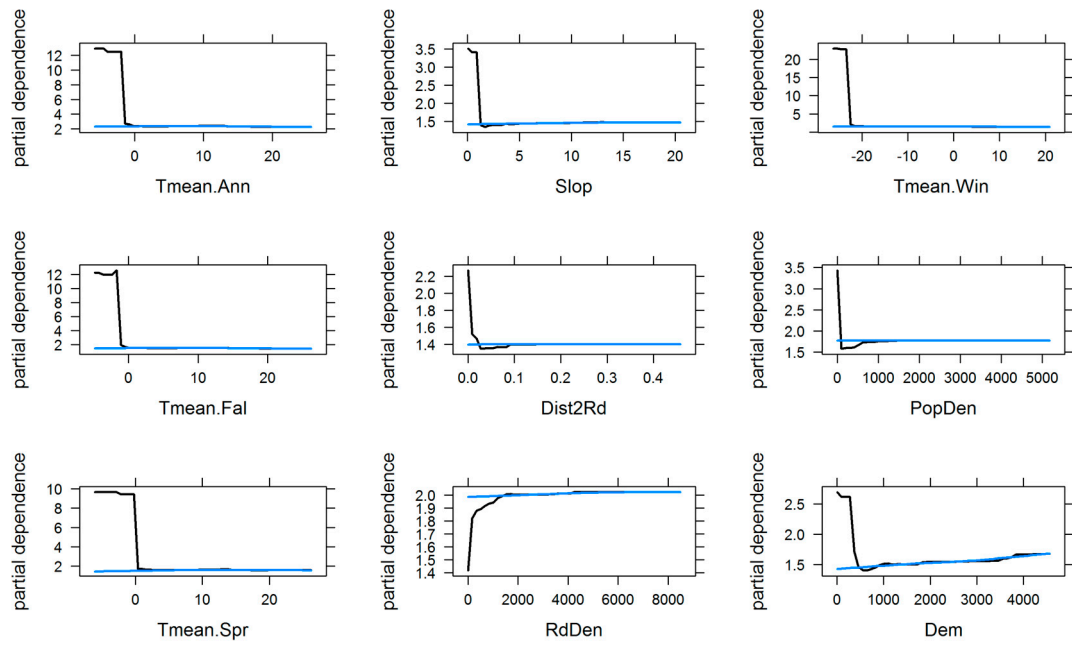

**Figure S12.** The partial dependence plots for national scale mean fire size (RF).

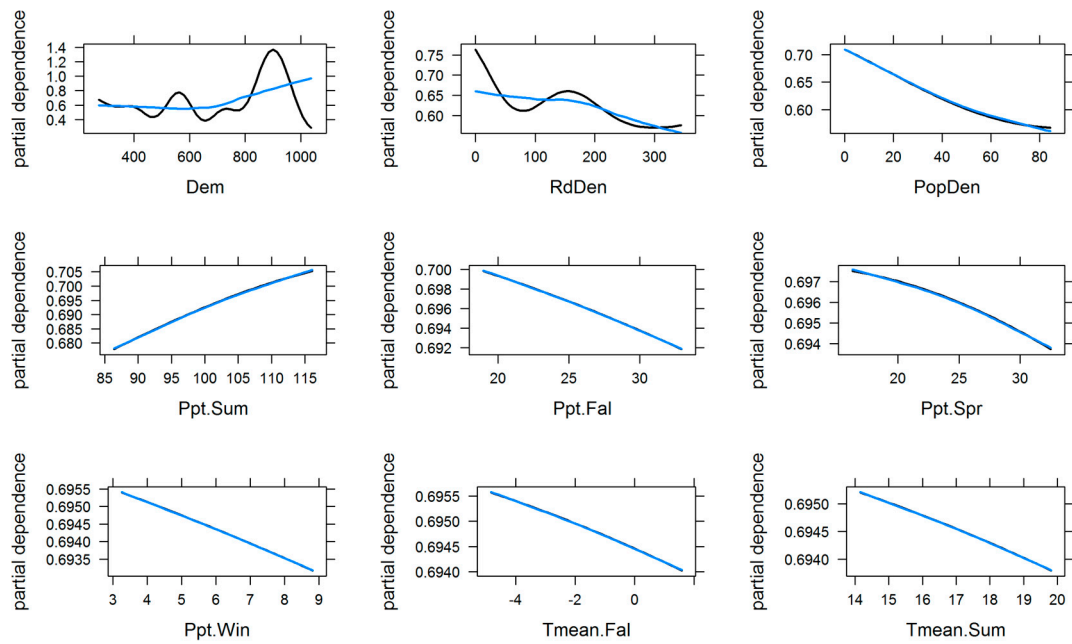

**Figure S13.** The partial dependence plots for Zone I mean fire size (SVM).

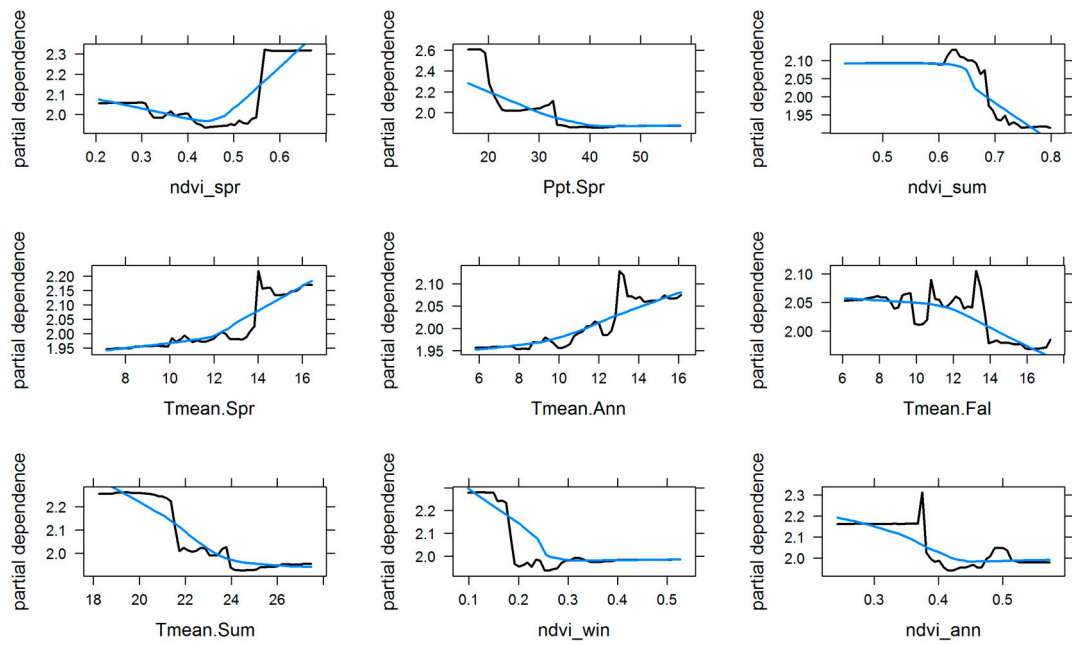

**Figure S14.** The partial dependence plots for Zone III mean fire size (RF).

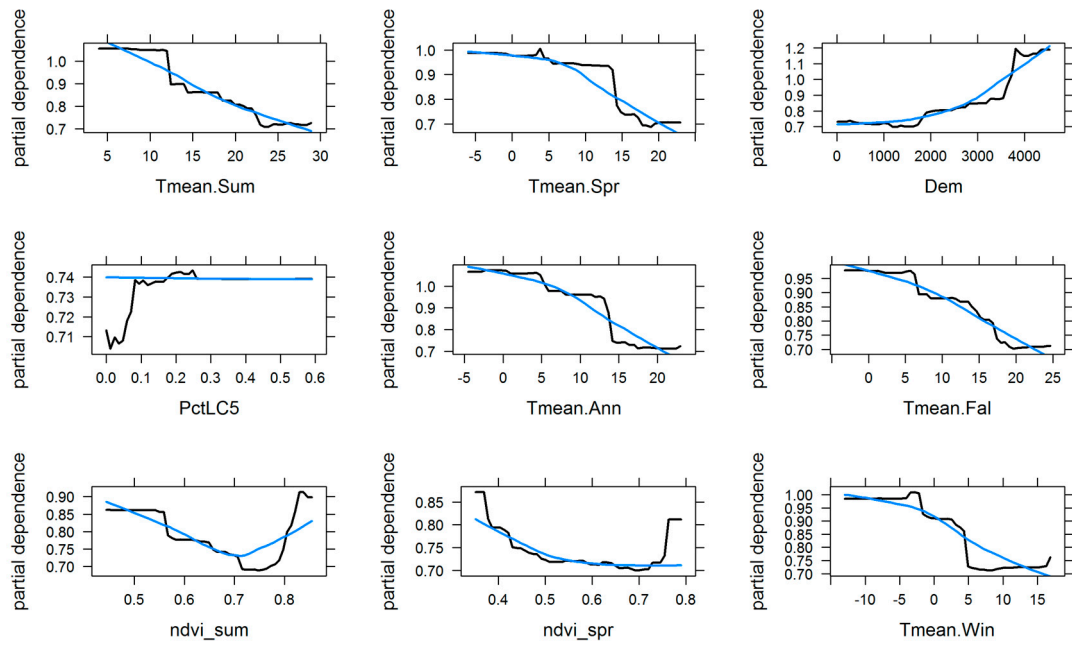

**Figure S15.** The partial dependence plots for Zone IV mean fire size (RF).
